EXPRESSION OF CONCERN

# Expression of Concern: Regulation of Glioblastoma Progression by Cord Blood Stem Cells Is Mediated by Downregulation of Cyclin D1

The *PLOS One* Editors

Following the publication of this article [1], concerns were raised that the Fig S4A GAPDH panel of this article [1] appears similar to the Fig 5A and Fig 5B GAPDH panels of [2, retracted in 3], the Fig 5D and left Fig S3 GAPDH panels of [4], retracted in [5], and the Fig 7C GAPDH panel of [6, retracted in 7], despite being used to represent different experimental conditions.

The authors did not respond to editorial communications regarding these concerns.

In light of the concerns raised the *PLOS One* Editors issue this Expression of Concern to notify readers of the concerns with Fig S4 and to inform readers that these results should be interpreted with caution.

## References

1. Velpula KK, Dasari VR, Tsung AJ, Gondi CS, Klopfenstein JD, Mohanam S, et al. Regulation of glioblastoma progression by cord blood stem cells is mediated by downregulation of cyclin D1. *PLoS One*. 2011;6(3):e18017. <https://doi.org/10.1371/journal.pone.0018017> PMID: 21455311
2. Dasari VR, Kaur K, Velpula KK, Gujrati M, Fassett D, Klopfenstein JD, et al. Upregulation of PTEN in glioma cells by cord blood mesenchymal stem cells inhibits migration via downregulation of the PI3K/Akt pathway. *PLoS One*. 2010;5(4):e10350. <https://doi.org/10.1371/journal.pone.0010350> PMID: 20436671
3. The PLOS One Editors. Retraction: Upregulation of PTEN in Glioma Cells by Cord Blood Mesenchymal Stem Cells Inhibits Migration via Downregulation of the PI3K/Akt Pathway. *PLoS ONE*. 2020;15(3):e0231283. <https://doi.org/10.1371/journal.pone.0231283>
4. Dasari VR, Velpula KK, Kaur K, Fassett D, Klopfenstein JD, Dinh DH, et al. Cord blood stem cell-mediated induction of apoptosis in glioma downregulates X-linked inhibitor of apoptosis protein (XIAP). *PLoS One*. 2010;5(7):e11813. <https://doi.org/10.1371/journal.pone.0011813> PMID: 20676365
5. The PLOS One Editors. The PLOS One Editors. Retraction: Cord blood stem cell-mediated induction of apoptosis in glioma downregulates X-linked inhibitor of apoptosis protein (XIAP). *PLoS One*. 2025;20(7):e0327907. <https://doi.org/10.1371/journal.pone.0327907> PMID: 40644404
6. Dasari VR, Velpula KK, Alapati K, Gujrati M, Tsung AJ. Cord blood stem cells inhibit epidermal growth factor receptor translocation to mitochondria in glioblastoma. *PLoS One*. 2012;7(2):e31884. <https://doi.org/10.1371/journal.pone.0031884> PMID: 22348136
7. The PLOS One Editors. Retraction: Cord blood stem cells inhibit epidermal growth factor receptor translocation to mitochondria in glioblastoma. *PLoS One*. 2025;20(7):e0327905. <https://doi.org/10.1371/journal.pone.0327905> PMID: 40644383

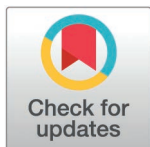

## OPEN ACCESS

**Citation:** The *PLOS One* Editors (2025) Expression of Concern: Regulation of Glioblastoma Progression by Cord Blood Stem Cells Is Mediated by Downregulation of Cyclin D1. *PLoS One* 20(12): e0337964. <https://doi.org/10.1371/journal.pone.0337964>

**Published:** December 2, 2025

**Copyright:** © 2025 The *PLOS One* Editors. This is an open access article distributed under the terms of the [Creative Commons Attribution License](https://creativecommons.org/licenses/by/4.0/), which permits unrestricted use, distribution, and reproduction in any medium, provided the original author and source are credited.
